# Supplementary material for: The Antidepressant-like Effect of Flavonoids from Trigonella Foenum-Graecum Seeds in Chronic Restraint Stress Mice via Modulation of Monoamine Regulatory Pathways
Source: MDPI journal article supplement (doi:10.3390/molecules24061105), 2019-03-20
Supplement: s1 [file s1]

RT=15.80 min

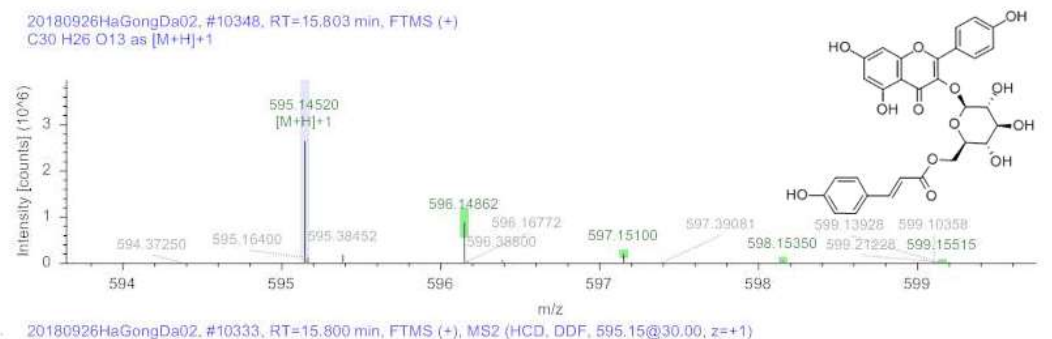

RT=16.29 min

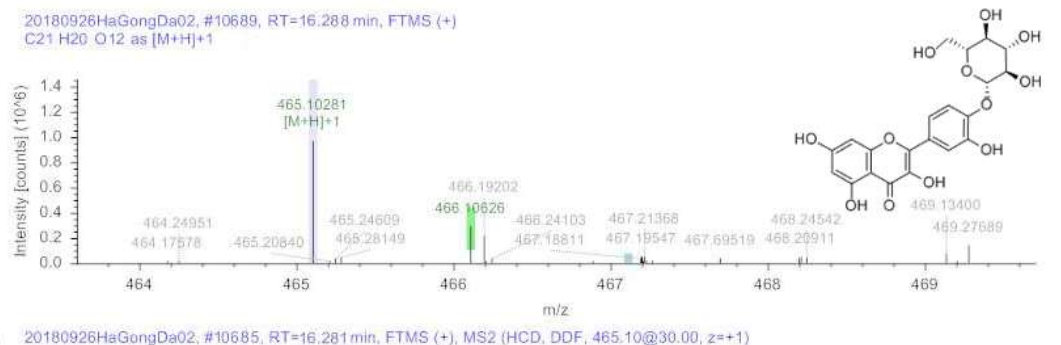

RT=16.84 min

20180926HaGongDa02, #11781, RT=16.838 min, FTMS (+)  
C27 H30 O15 as [M+H]<sup>+</sup>1

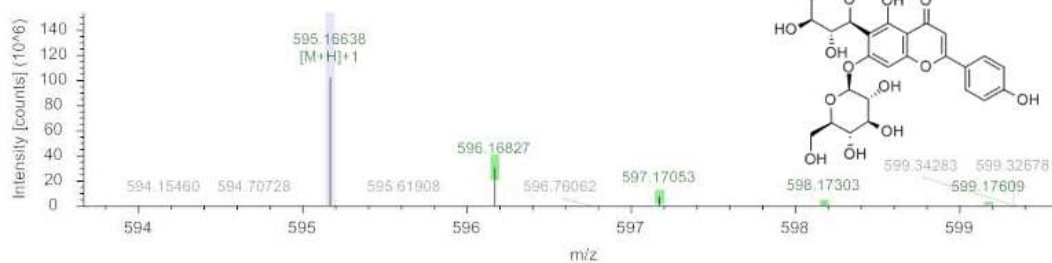

20180926HaGongDa02, #11782, RT=16.839 min, FTMS (+), MS2 (HCD, DDF, 595.17@30.00, z=+1)

Apigenin 4',7-O-diglucoside

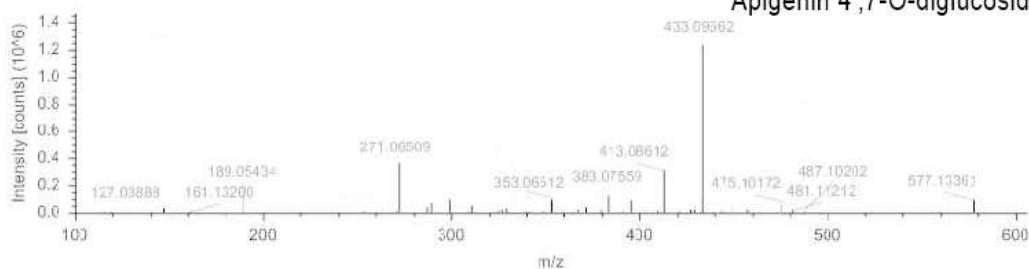

RT=18.08 min

20180926HaGongDa02, #11985, RT=18.128 min, FTMS (+)  
C26 H28 O14 as [M+H]<sup>+</sup>1

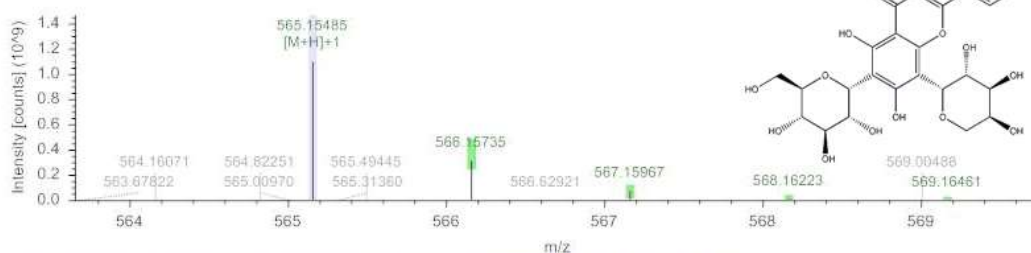

20180926HaGongDa02, #11986, RT=18.129 min, FTMS (+), MS2 (HCD, DDF, 565.15@30.00, z=+1)

Schaftoside

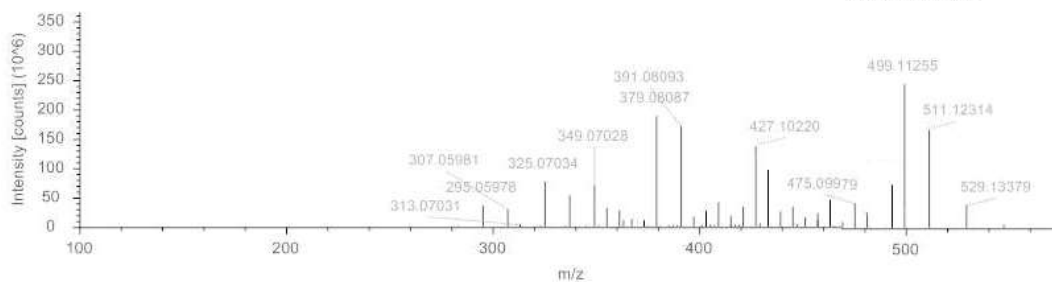

RT=18.86 min

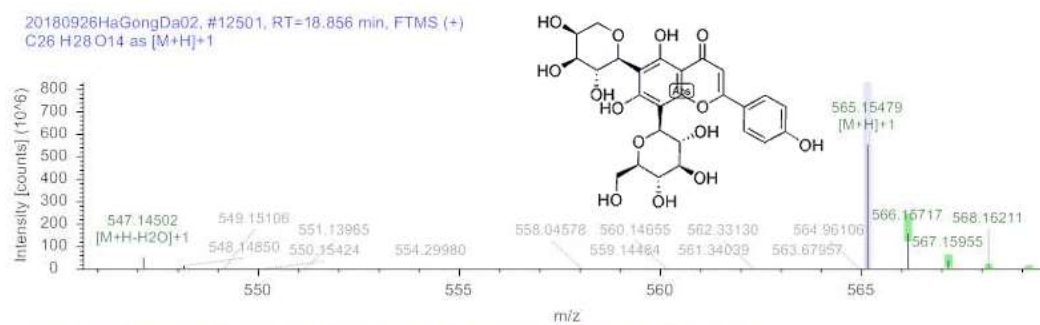

20180926HaGongDa02, #12507, RT=18.872 min, FTMS (+), MS2 (HCD, DDF, 547.15@30.00, z=+1)

Isoschaftoside

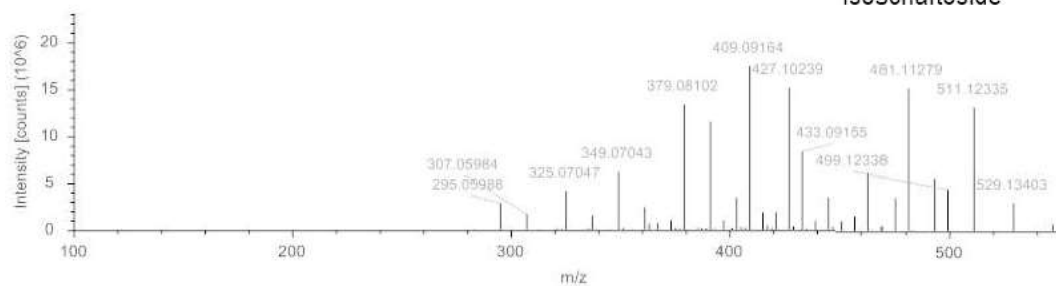

RT=21.87 min

20180926HaGongDa02, #14056, RT=21.133 min, FTMS (+)  
C21 H20 O10 as [M+H]<sup>+</sup>1

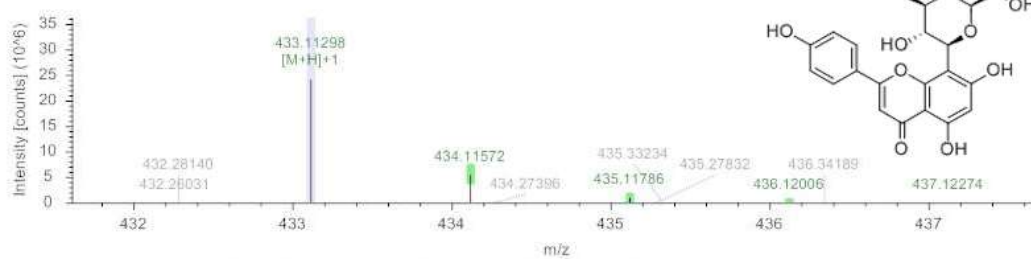

20180926HaGongDa02, #14057, RT=21.134 min, FTMS (+), MS2 (HCD, DDF, 433.11@30.00, z=+1)

Apigenin 8-C- $\alpha$ -D-glucopyranoside

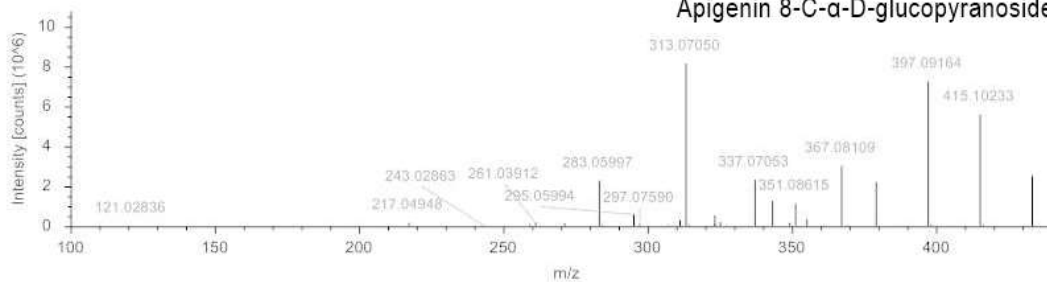

**Figure S1.** The mass spectra and chemical structures of compounds of FSF.
